# Supplementary material for: Mapping Malaria Risk in India between 2019-2023: A Tool for the Public to Track Malaria
Source: Research Square preprint supplement (doi:10.21203/rs.3.rs-6781302/v1), 2025-08-06
Supplement: Supplementary file 2 [file 9491c7c498f77b34c194a170.docx]

*Supplementary Material 2 on*

**Mapping Malaria Risk in India between 2019-2023: A Tool for the Public to Track Malaria**

Avik Kumar Sam1, Neha Keshri1, Ipsita Pal Bhowmick2, Anup Anvikar3,

Harish C. Phuleria1,4,5 *

1. *Environmental Science and Engineering Department, Indian Institute of Technology Bombay, Mumbai, India*
2. *Indian Council of Medical Research – Regional Medical Research Centre, Dibrugarh, India*
3. *Indian Council of Medical Research – National Institute of Malaria Research, Delhi, India*
4. *Center in Climate Studies, Indian Institute of Technology Bombay, Mumbai, India*
5. *National Disease Modelling Consortium, Indian Institute of Technology Bombay, Mumbai, India*

* **Corresponding Author:** [phuleria@iitb.ac.in](mailto:phuleria@iitb.ac.in)

# **User Guide: How to Use the Malaria Awareness Dashboard**

This guide will help you understand and use the Malaria Awareness Dashboard. It’s designed to be simple and useful, especially if you’re using the dashboard for the first time.

##

## **Getting Started**

When you open the dashboard, here’s what you’ll see and what it means:


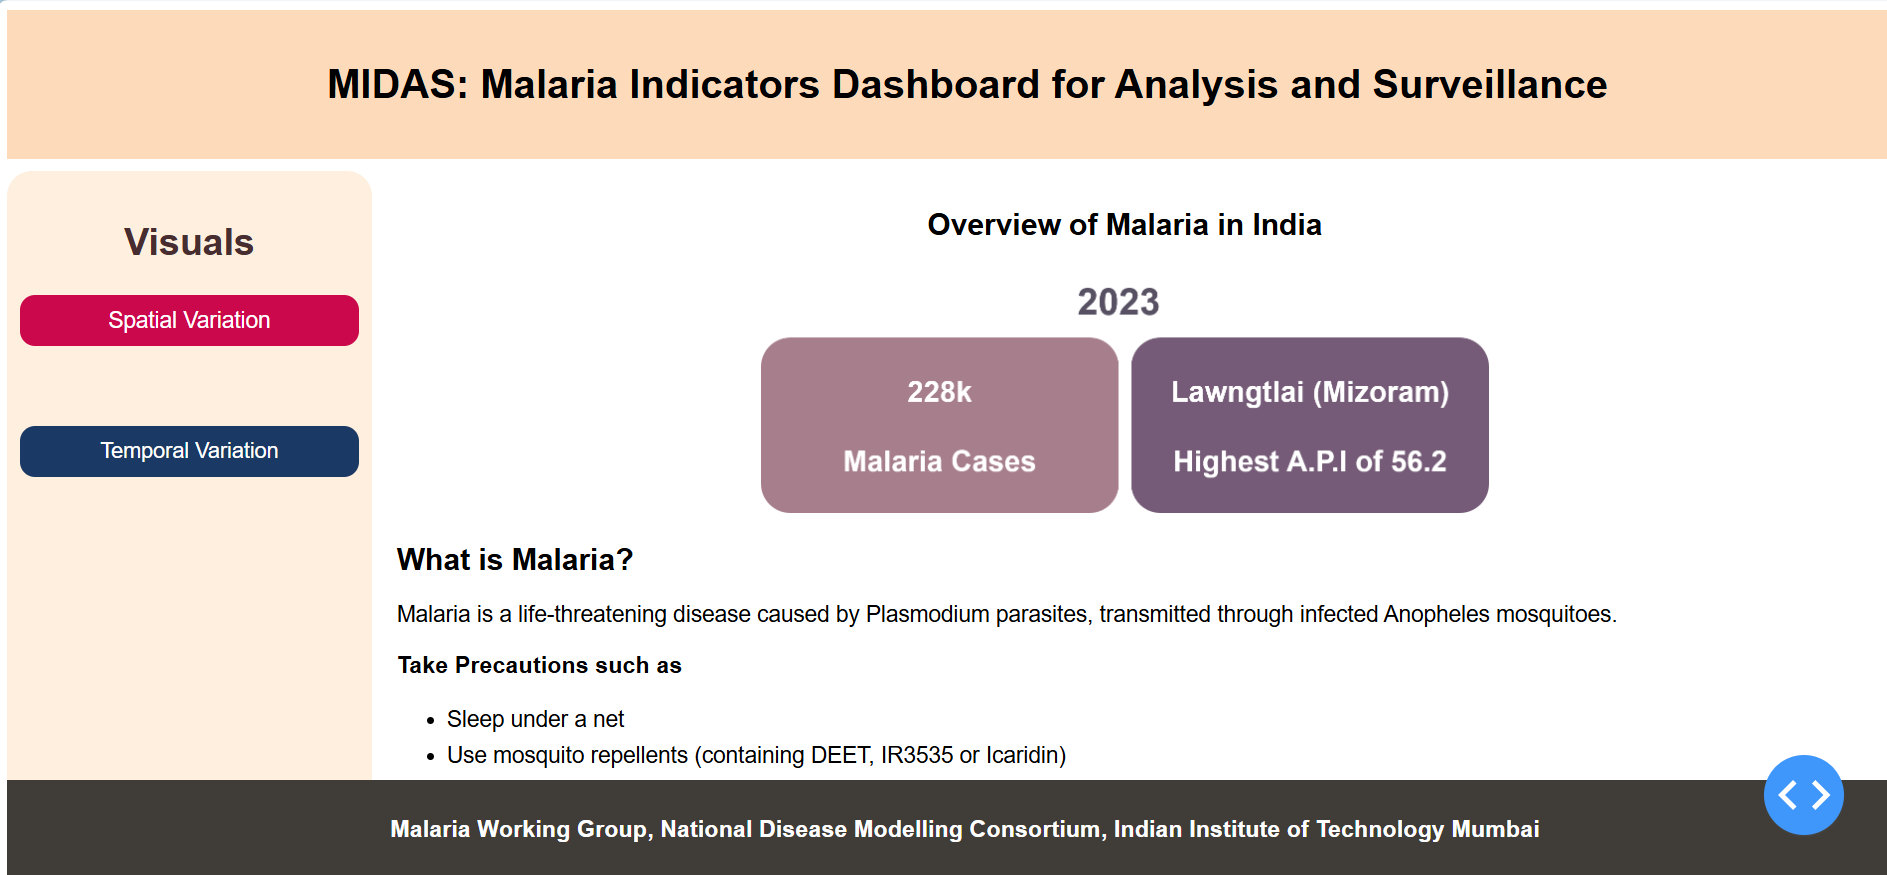


Figure 1 Screenshot of the main page.

### **Dashboard Title and Subtitle**

At the top, you’ll see the title **"Dashboard for Malaria Cases"**. Just below that, it says **"Visualizing Spatial and Temporal Data to Raise Awareness."** This tells you that the dashboard is meant to help people understand how malaria is spreading across time and space in India.

### **Summary Highlights (Middle of the Page)**

Right in the center of the page, you’ll find two important facts:

- **Total Cases**: It shows that India had **228,000 malaria cases in 2023**.
- **Most Affected Area**: It also shows the name of the district with the highest number of malaria cases per population (called A.P.I.). In this case, it’s **Lawmgtlai in Mizoram with an A.P.I of 56.2**.

### **Left-side Navigation:**

On the left side of the screen, you’ll see two buttons:

- **Spatial Variation** – lets you explore how malaria patterns vary across different regions of India from 2019 to 2023, showing differences by state and district each year.
- **Temporal Variation** – helps you see how malaria trends have changed over time, from 2019 to 2023, focusing on changes within specific districts year by year.

### **Footer**

At the bottom, there’s a short message: **“ANERG - IIT Bombay - Working Towards a Malaria-Free World.”** Ifyou will click in this, then it will redirect you to our official lab website.

### **What to do now?**

Start by clicking either **Spatial Variation** or **Temporal Variation** on the left to explore more!

## **Spatial Variation**

This page shows where malaria cases are more common across different parts of India.

When you first click on the **“Spatial Variation”** button, a **dropdown** appears where you can **select a year**, like this:


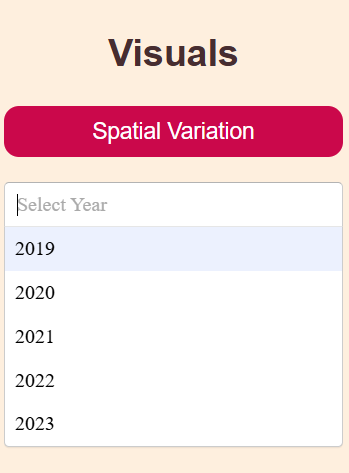


Figure 2 Screenshot of the top left panel (Selection of year)

After selecting a **year**, a second dropdown will appear to **select the region**. Currently, the only option is **India**, so you must select that.


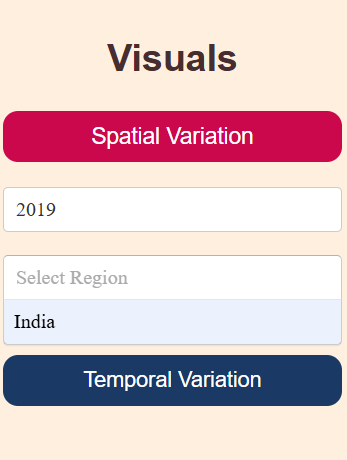


Figure 3 Screenshot of the top left panel (Selection of Region)

Once the region is selected, a list of **radio buttons** will appear, allowing you to choose from various **malaria indicators**.


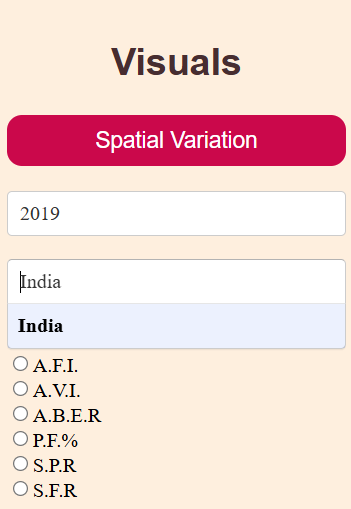


Figure 4 Screenshot of the top left panel (Selection of malaria indicators)

For example, if you select **A.P.I.** from the list, you’ll see a graph like the one below


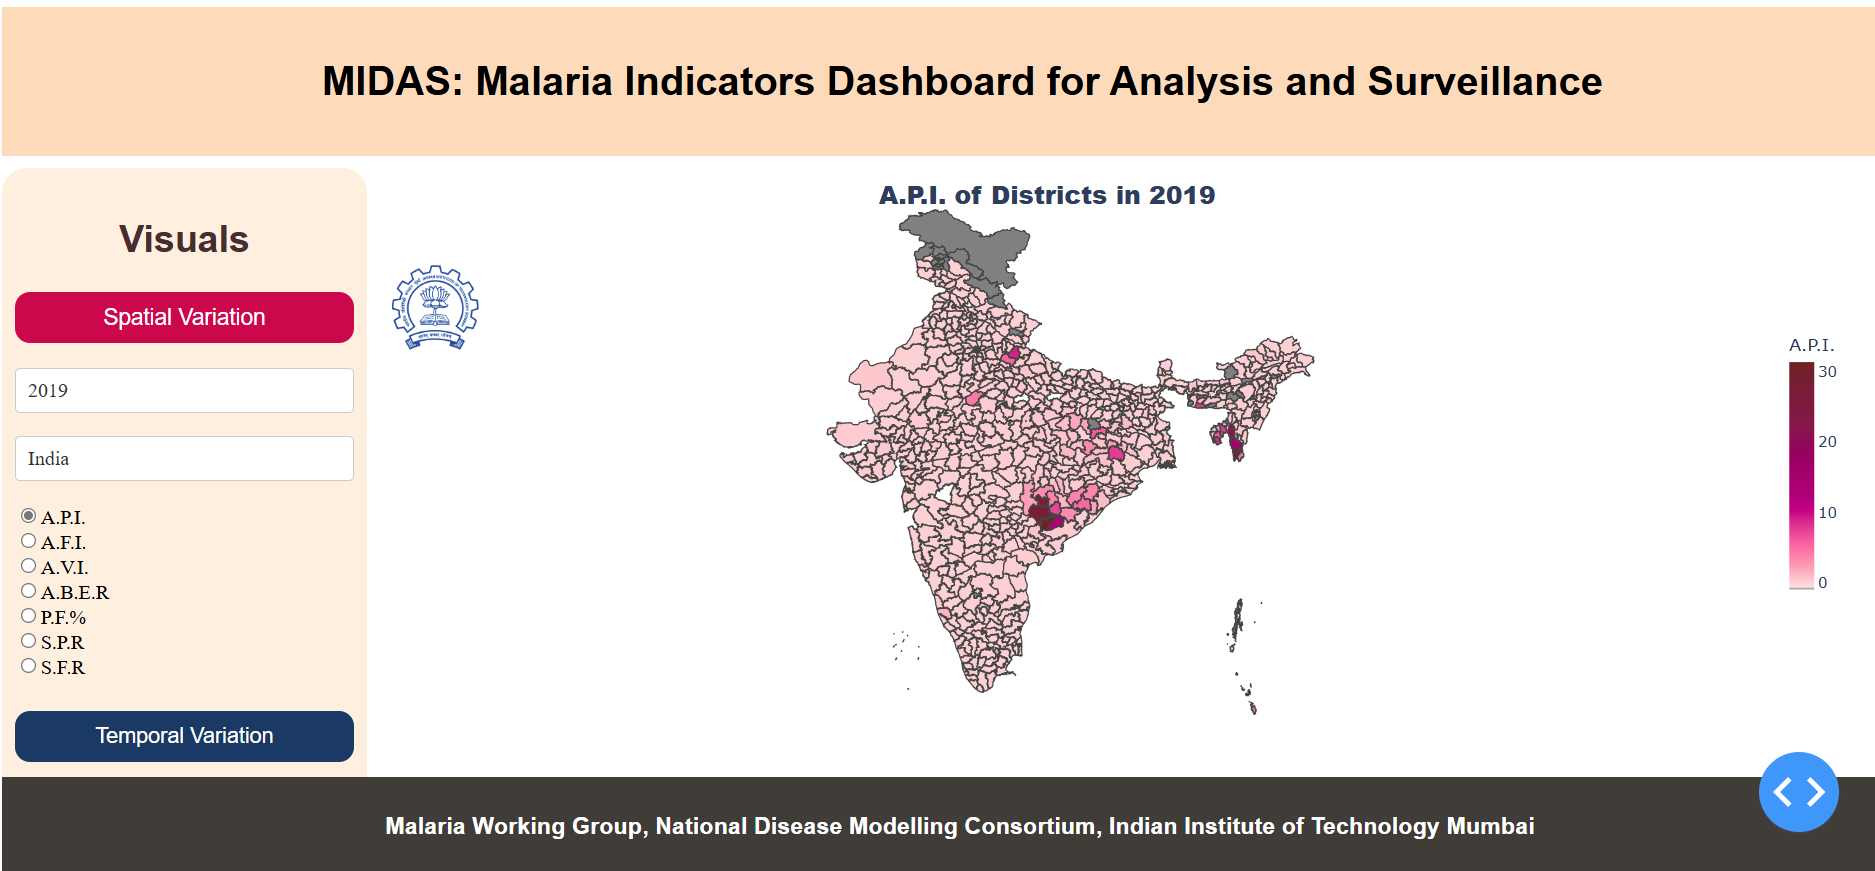


Figure 5 Screenshot of the dashboard output showing the spatial variations in API

You can **hover your cursor** over the map to get more details about a specific district or state, including the value of the selected indicator. You can also **download the map** by clicking on this icon (
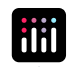
) in the top-right corner.

Similar way, you can choose different indicators and different year.

## **Temporal Variation**

This page helps you understand **how malaria cases have changed over time**, from 2019 to 2023.

### After clicking on the **“Temporal Variation”** button, a **dropdown** will appear for selecting a **state**, like this:

###
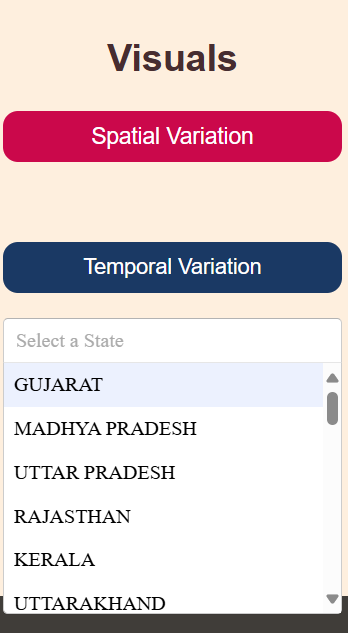


Figure 6 Screenshot of the bottom left panel (Selection of state)

### Once a **state** is selected, another dropdown appears for selecting a **district** within that state:


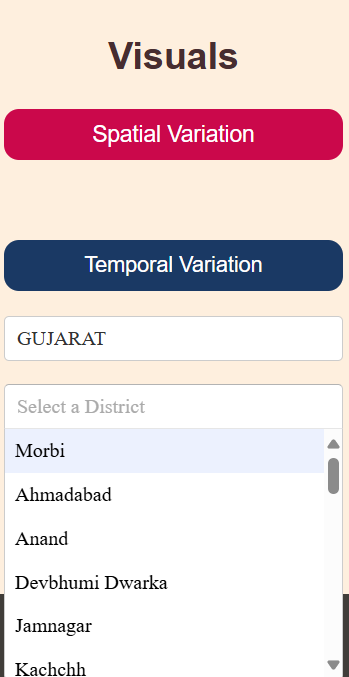


Figure 7 Screenshot of the bottom left panel (Selection of districts)

After selecting the district, a list of **radio buttons** will appear with different **malaria indicators** to choose from:


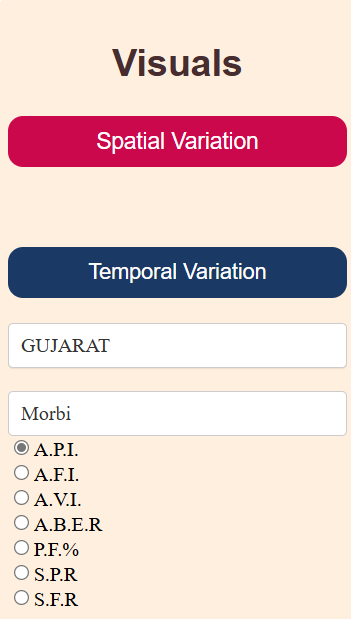


Figure 8 Screenshot of the bottom left panel (Selection of malaria parameters)

Once you choose an indicator — for example, **A.P.I.** — a **line graph** will be generated showing three key trends:

1. Variation of average **A.P.I.** in **India** from 2019 to 2023
2. Variation of average **A.P.I.** in the **selected district** of the selected state from 2019 to 2023
3. Variation of **A.P.I.** in the **selected state** (average) from 2019 to 2023


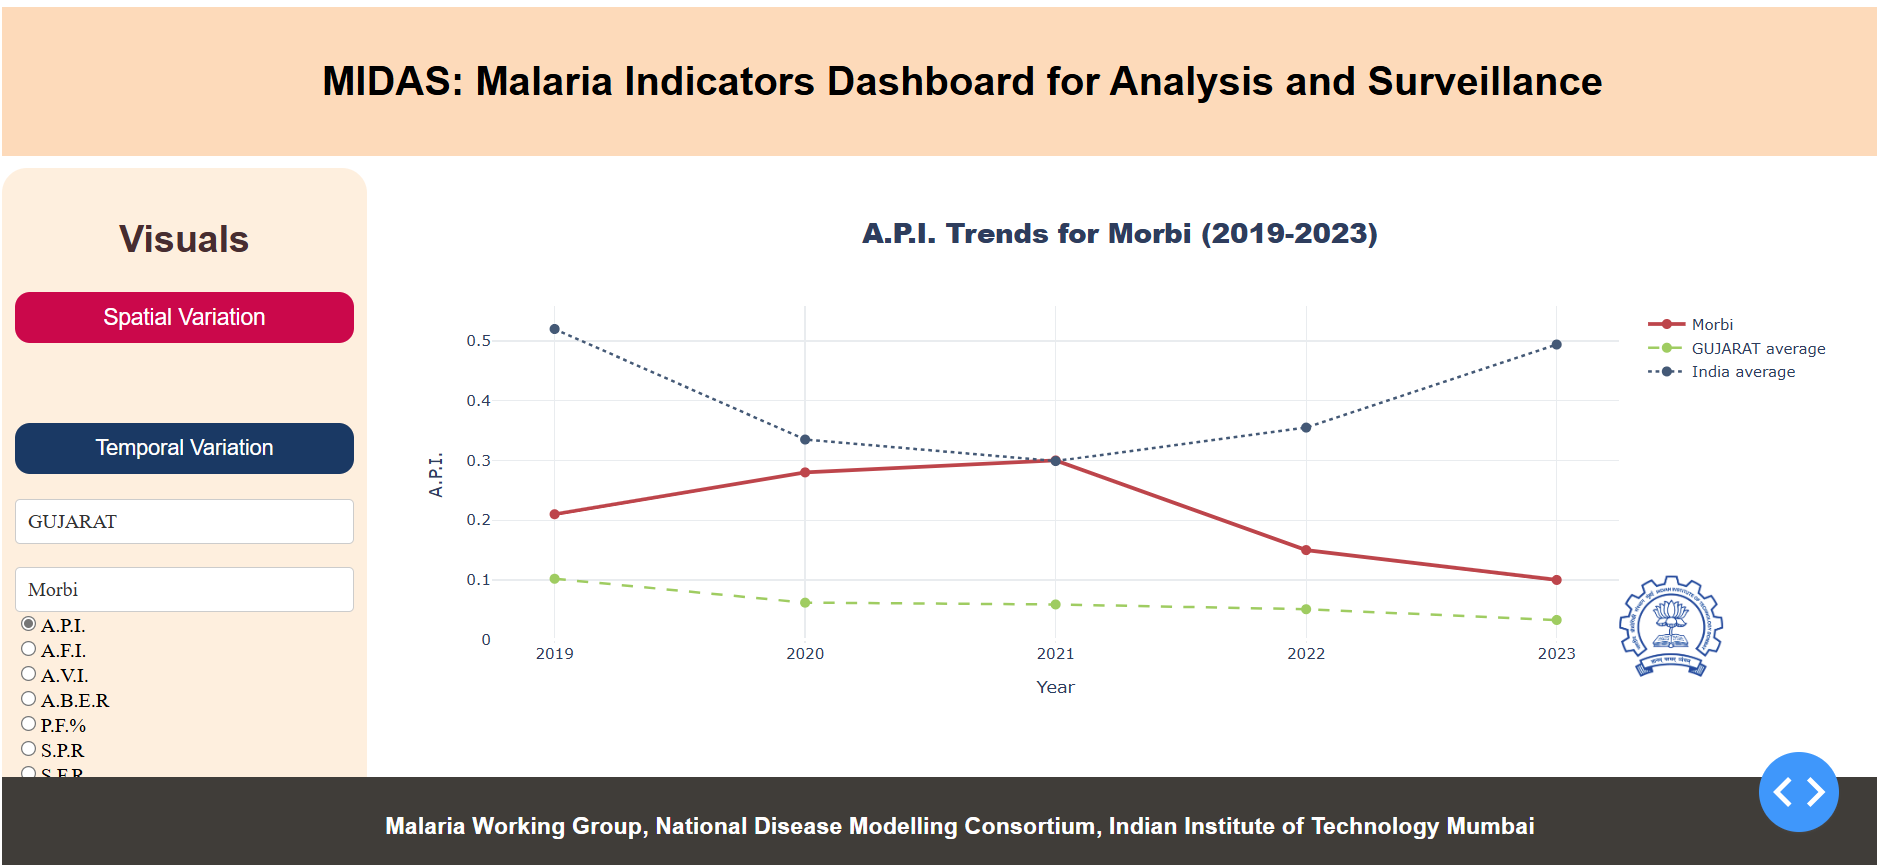


Figure 9 Screenshot of the dashboard showing the temporal trends in API for Morbi, Gujarat.

Just like in the Spatial Variation section, you can **download the graph** using the same icon in the top-right corner.
